# Supplementary material
Source: MDPI journal article supplement (https://www.mdpi.com/search?q=beverages-11-00048)
Supplement: s001 [file beverages-11-00048-s001.zip]

Table S1. Mean (n=3) peak areas (%) and related errors of volatile compounds detected by HS-SPME/GC-MS on DVB/CAR/PDMS sorbent. Statistically significant differences among samples at  $p < 0.001$  (\*\*\*) or  $p < 0.01$  (\*\*), according to ANOVA. Different letters in the same row indicate statistically significant differences ( $p < 0.05$ ) according to Tukey HSD test.

| Volatile compound        | Sample                  |                         |                         |                          |                          |                          |                          | ANOVA |
|--------------------------|-------------------------|-------------------------|-------------------------|--------------------------|--------------------------|--------------------------|--------------------------|-------|
|                          | KPJ                     | KPW                     | KJ                      | KW                       | TW                       | TWKW                     | STWKW                    |       |
| ethyl acetate            | 9.90±3.15 <sup>a</sup>  | 11.74±0.27 <sup>a</sup> | 4.69±0.70 <sup>ab</sup> | 15.26±0.26 <sup>ac</sup> | 4.48±0.42 <sup>ab</sup>  | 5.81±0.11 <sup>ab</sup>  | 15.19±2.48 <sup>ac</sup> | **    |
| 2-methyl-1-propanol      | 0.40±0.03 <sup>a</sup>  | 1.52±0.12 <sup>b</sup>  | 0.45±0.16 <sup>a</sup>  | 0.51±0.05 <sup>a</sup>   | 0.70±0.25 <sup>a</sup>   | 1.25±0.03 <sup>a</sup>   | 1.32±0.28 <sup>b</sup>   | **    |
| 3-methyl-1-butanol       | 2.11±0.01 <sup>a</sup>  | 17.49±0.44 <sup>b</sup> | 1.74±0.04 <sup>a</sup>  | 8.60±0.47 <sup>c</sup>   | 12.09±0.3 <sup>d</sup>   | 12.35±0.41 <sup>d</sup>  | 12.68±0.13 <sup>d</sup>  | ***   |
| 2-methyl-1-butanol       | 0.88±0.06 <sup>a</sup>  | 6.92±0.27 <sup>b</sup>  | 0.5±0.06 <sup>a</sup>   | 3.10±0.24 <sup>c</sup>   | 2.81±0.12 <sup>c</sup>   | 2.99±0.17 <sup>c</sup>   | 3.34±0.05 <sup>c</sup>   | ***   |
| ethyl butanoate          | 35.87±1.75 <sup>a</sup> | 3.15±0.17 <sup>b</sup>  | 31.75±0.62 <sup>c</sup> | 2.71±0.06 <sup>b</sup>   | 0.57±0.03 <sup>b</sup>   | 0.79±0.05 <sup>b</sup>   | 0.82±0.06 <sup>b</sup>   | ***   |
| 1-hexanol                | 30.33±1.35 <sup>a</sup> | 2.26±0.07 <sup>b</sup>  | 36.87±6.83 <sup>a</sup> | 3.61±0.14 <sup>b</sup>   | 0.16±0.02 <sup>b</sup>   | 0.42±0.02 <sup>b</sup>   | 0.64±0.13 <sup>b</sup>   | ***   |
| 3-methyl-1-butyl acetate | 3.01±0.02 <sup>a</sup>  | 2.97±0.13 <sup>b</sup>  | 2.40±0.34 <sup>c</sup>  | 7.56±0.05 <sup>abc</sup> | 7.21±0.31 <sup>abc</sup> | 7.40±0.64 <sup>abc</sup> | 2.16±0.10 <sup>d</sup>   | ***   |
| 2-methyl-1-butyl acetate | 0.00±0.00 <sup>a</sup>  | 0.58±0.02 <sup>b</sup>  | 0.00±0.00 <sup>a</sup>  | 0.69±0.02 <sup>b</sup>   | 0.38±0.02 <sup>c</sup>   | 0.42±0.03 <sup>b</sup>   | 0.45±0.08 <sup>b</sup>   | ***   |
| ethyl hexanoate          | 2.10±0.13 <sup>a</sup>  | 10.66±0.30 <sup>b</sup> | 3.67±0.18 <sup>c</sup>  | 12.6±0.37 <sup>b</sup>   | 14.13±0.59 <sup>d</sup>  | 13.78±0.57 <sup>d</sup>  | 9.88±0.62 <sup>b</sup>   | ***   |
| hexyl acetate            | 7.05±0.51 <sup>a</sup>  | 0.77±0.04 <sup>b</sup>  | 2.58±0.15 <sup>c</sup>  | 7.18±0.19 <sup>a</sup>   | 0.59±0.02 <sup>b</sup>   | 1.88±0.15 <sup>bc</sup>  | 0.00±0.00 <sup>b</sup>   | ***   |
| nonanal                  | 0.38±0.08               | 0.24±0.04               | 0.47±0.11               | 0.33±0.18                | 0.15±0.06                | 0.13±0.01                | 0.00±0.00                |       |
| 2-phenylethanol          | 0.28±0.12 <sup>a</sup>  | 1.16±0.01 <sup>b</sup>  | 0.00±0.00 <sup>a</sup>  | 0.70±0.12 <sup>b</sup>   | 0.83±0.00 <sup>b</sup>   | 0.79±0.24 <sup>b</sup>   | 0.96±0.14 <sup>b</sup>   | **    |
| methyl octanoate         | 0.00±0.00 <sup>a</sup>  | 0.53±0.02 <sup>b</sup>  | 0.00±0.00 <sup>a</sup>  | 0.73±0.04 <sup>c</sup>   | 0.08±0.01 <sup>a</sup>   | 0.18±0.01 <sup>d</sup>   | 0.00±0.00 <sup>a</sup>   | ***   |
| ethyl benzoate           | 2.74±0.07 <sup>a</sup>  | 0.81±0.07 <sup>b</sup>  | 2.12±0.20 <sup>c</sup>  | 0.81±0.08 <sup>b</sup>   | 0.31±0.03 <sup>d</sup>   | 0.31±0.03 <sup>bd</sup>  | 0.00±0.00 <sup>d</sup>   | ***   |
| diethyl succinate        | 0.61±0.01 <sup>a</sup>  | 0.22±0.03 <sup>b</sup>  | 0.8±0.12 <sup>a</sup>   | 0.13±0.01 <sup>b</sup>   | 0.45±0.01 <sup>ab</sup>  | 0.40±0.04 <sup>ab</sup>  | 2.32±0.18 <sup>c</sup>   | ***   |
| ethyl octanoate          | 1.20±0.34 <sup>a</sup>  | 31.8±0.29 <sup>b</sup>  | 3.67±2.03 <sup>a</sup>  | 28.08±0.73 <sup>bd</sup> | 45.77±0.81 <sup>c</sup>  | 43.08±1.29 <sup>c</sup>  | 38.05±2.77 <sup>b</sup>  | ***   |
| heptyl isobutyl ketone   | 1.87±0.54               | 2.6±0.98                | 7.07±3.63               | 2.03±0.53                | 0.70±0.36                | 0.26±0.02                | 4.84±0.13                |       |
| 2-phenylethyl acetate    | 0.36±0.00 <sup>a</sup>  | 0.16±0.02 <sup>b</sup>  | 0.00±0.00 <sup>c</sup>  | 0.28±0.05 <sup>ab</sup>  | 0.39±0.01 <sup>a</sup>   | 0.34±0.01 <sup>a</sup>   | 0.00±0.00 <sup>c</sup>   | ***   |
| ethyl 9-decenoate        | 0.00±0.00 <sup>a</sup>  | 0.49±0.02 <sup>b</sup>  | 0.00±0.00 <sup>a</sup>  | 1.73±0.00 <sup>c</sup>   | 0.20±0.00 <sup>a</sup>   | 0.64±0.03 <sup>b</sup>   | 2.74±0.14 <sup>d</sup>   | ***   |
| ethyl decanoate          | 0.91±0.55 <sup>a</sup>  | 3.92±0.19 <sup>b</sup>  | 1.22±0.53 <sup>a</sup>  | 3.38±0.13 <sup>a</sup>   | 8.02±0.94 <sup>c</sup>   | 6.78±0.52 <sup>b</sup>   | 4.61±0.39 <sup>b</sup>   | ***   |

**Table S2.** Concentration ( $\mu\text{g/L}$ ) of volatile compounds in kiwifruit wine (KW), Trebbiano wine (TW) and their blend (TWKW), and odor threshold (OT) of the volatiles, taken from literature [31,35–40].

| Volatile compound            | Sample |        |        | OT(mg/L) |
|------------------------------|--------|--------|--------|----------|
|                              | KW     | TW     | KWTW   |          |
| Acetic Acid                  | 251000 | 181000 | 163000 | 200000   |
| Benzoic Acid                 | 187    | 245    | 259    | 1000     |
| Butyric Acid                 | 1430   | 705    | 820    | 173      |
| Decanoic Acid                | 1350   | 2580   | 1940   | 1000     |
| Dodecanoic Acid              | 21.5   | 741    | 144    | 1000     |
| Heptanoic Acid               | 19     | 7.18   | 12.4   | -        |
| Hexanoic Acid                | 1350   | 1750   | 1640   | 420      |
| Isobutyric Acid              | 1080   | 307    | 446    | 2300     |
| Isovaleric Acid              | 591    | 427    | 470    | 33       |
| Octanoic Acid                | 1630   | 2590   | 2390   | 500      |
| Phenylacetic Acid            | 45.5   | 178    | 167    | 1000     |
| Propionic Acid               | 881    | 1340   | 1020   | 8100     |
| 1,4-Butanediol               | 67.6   | 189    | 182    | -        |
| Butan-1-ol                   | 16.8   | 14.6   | 14     | 150000   |
| Isoamyl Alcol                | 4070   | 6650   | 4160   | 30000    |
| 1-Hexanol                    | 851    | 361    | 459    | 500      |
| 1-Propanol                   | 37900  | 14000  | 18800  | 306000   |
| Isobutanol                   | 11900  | 4350   | 5760   | 40000    |
| 2-Ethylhexan-1-ol            | 11.8   | 19.3   | 16.2   | 270      |
| 3-Octanol                    | 28.2   | 7.11   | 10.3   | 18       |
| 2-Phenylethan-1-ol           | 1920   | 5590   | 4270   | 14000    |
| Furaneol                     | 137    | 50.1   | 47     | 5        |
| 2-Hexen-1-ol                 | 40.3   | 44.5   | 46.2   | 15       |
| (Z)-3-Hexen-1-ol             | 33.5   | 2.96   | 5.76   | 70       |
| (E)-2-Hexenal                | 37.4   | 31.5   | 54.5   | 17       |
| (E) 3-Hexen-1-ol             | 40.8   | 11.6   | 15.9   | 400      |
| 1-Octen-3-ol                 | 1.01   | 0.113  | 0.085  | 1        |
| 3-Mercapto-1-propanol        | 18.2   | 115    | 79.8   | -        |
| 2-Mercapto-ethanol           | 66.4   | 27.4   | 39.9   | -        |
| Metionol                     | 916    | 771    | 882    | 1000     |
| Acrolein                     | 67.1   | 58.6   | 29.8   |          |
| Acetoin                      | 882    | 8580   | 17400  | 150000   |
| Dyacetyl                     | 0.066  | 1.01   | 0.158  | 100      |
| Acetovanillone               | 6.45   | 53.4   | 37.2   | 1000     |
| 3-Methyl-2,4-nonanedione     | 0.003  | 0.004  | 0.005  |          |
| 5-Ethyl-2-furaldehyde        | 0.365  | 3.16   | 3.68   |          |
| 5-Methylfurfural             | 25     | 0.343  | 4.59   | 20000    |
| Furfural                     | 51.2   | 34.3   | 10.8   | 3000     |
| Vanillin                     | 26.1   | 45.2   | 33.9   | 60       |
| Acetaldehyde diethyl acetale | 28     | 58.6   | 51     | -        |
| Phenylacetaldehyde           | 1.34   | 14     | 2.22   | 1        |
| Acetaldehyde                 | 918    | 1700   | 1380   | 500      |
| Benzaldehyde                 | 5.15   | 13.1   | 6.84   | 2000     |
| N-Octaldehyde                | 0.672  | 0.419  | 0.497  | -        |

|                          |       |        |        |        |
|--------------------------|-------|--------|--------|--------|
| Piperitone               | 1.22  | 1.08   | 1.11   | -      |
| Tujone                   | 1.04  | 0.0023 | 0.0506 | -      |
| Benzyl alcohol           | 11.9  | 4.77   | 6.11   | 200000 |
| Styrene                  | 3.27  | 5.29   | 7.55   | -      |
| p-Cymene                 | 1.68  | 0.378  | 0.499  | 11     |
| Ethyl decanoate          | 41.4  | 365    | 147    | 200    |
| Ethyl eptanoate          | 0.61  | 0.427  | 0.505  | 220    |
| Ethyl hexanoate          | 181   | 258    | 485    | 80     |
| Ethyl dodecanoate        | 5.45  | 114    | 11.1   | 14     |
| Ethyl nonanoate          | 0.385 | 1.42   | 1.19   | 377    |
| Ethyl octanoate          | 3.1   | 1340   | 852    | 5      |
| Ethyl propanoate         | 159   | 35.8   | 154    | 5      |
| Ethyl tetradecanoate     | 0.817 | 10.7   | 1.99   | 2000   |
| Ethyl undecanoate        | 0.292 | 0.13   | 0.163  | -      |
| Ethyl leucate            | 0.755 | 6.65   | 5.77   | 51     |
| Ethyl 4-methylpentanoate | 118   | 64.3   | 149    | 1409   |
| Ethyl isobutyrate        | 21.2  | 7.96   | 19.5   | 15     |
| Ethyl isovalerate        | 0.545 | 0.882  | 0.969  | 3      |
| Diethyl succinate        | 209   | 203    | 229    | 200000 |
| Ethyl 3-hydroxybutyrate  | 1.48  | 1.65   | 1.14   | 20000  |
| Ethyl acetate            | 1150  | 1440   | 1670   | 12000  |
| Ethyl L-lactate          | 264   | 1140   | 1330   | 154636 |
| Ethyl 2-phenylacetate    | 0.156 | 2.52   | 1.87   | 250    |
| Ethyl sorbate            | 0.009 | 0.021  | 0.024  | -      |
| Hexyl acetate            | 9.37  | 80.4   | 57     | 1500   |
| Isoamyl acetate          | 1510  | 2950   | 7930   | 30     |
| Isoamyl octanoate        | 0.842 | 2.8    | 1.32   | 125    |
| Isobutyl acetate         | 28.1  | 18.6   | 31.7   | 1600   |
| 2-Phenylethyl acetate    | 17.4  | 362    | 287    | 250    |
| Ethyl 2-furoate          | 3.18  | 7.14   | 6.95   | 132000 |
| Ethyl cinnamate          | 0.146 | 0.361  | 0.284  | 1.1    |
| Ethyl dihydrocinnammate  | 0.142 | 0.602  | 0.476  | 1.6    |
| Ethyl pentanoate         | 0.722 | 1.45   | 1.64   | -      |
| Ethyl vanillate          | 2.93  | 0.636  | 1.32   | 990    |
| Methyl anthranilate      | -     | 7.86   | 7.01   | 100    |
| Methyl hexanoate         | 25.3  | 8.78   | 14.7   | 1      |
| Methyl decanoate         | 1010  | 504    | 1020   | 1200   |
| Methyl dihydrojasmonate  | 0.158 | 0.04   | 0.134  | -      |
| Methyl salicylate        | 1.03  | 0.692  | 0.741  | 40     |
| Methyl vanillate         | 0.488 | 1.47   | 1.1    | 3000   |
| Linalyl acetate          | 50.9  | 27.9   | 37.2   | -      |
| 4-Ethylcatechol          | 76.2  | 3.32   | 24.7   | -      |
| 4-Vinylphenol            | 1190  | 1130   | 1560   | 180    |
| m-Cresol                 | 0.402 | 0.245  | 0.255  | 68     |
| o-Cresol                 | 1.09  | 0.456  | 0.544  | 31     |
| Guaiacol                 | 0.67  | 0.304  | 0.317  | 9.5    |
| 4-Ethylguaiacol          | 4.12  | 3.21   | 3.5    | 33     |
| 4-Vinylguaiacol          | 836   | 891    | 783    | 40     |
| 4-Ethylphenol            | 2.14  | 2.22   | 1.53   | 440    |

|                                            |        |         |         |        |
|--------------------------------------------|--------|---------|---------|--------|
| Xylenol                                    | 0.231  | 0.165   | 0.181   | -      |
| Syringol                                   | 13     | 41.2    | 25.8    | 570    |
| 4-Methylguaiacol                           | 0.41   | 0.064   | 0.137   | -      |
| 4-Allyl-2,6-dimethoxyphenol                | 2.1    | 1.37    | 0.63    | 1200   |
| 2-Methoxy-4-Propylphenol                   | 0.12   | 0.004   | 0.018   | 6      |
| Whiskey lactone Cis                        | 0.065  | 0.029   | 0.026   | 67     |
| Furanmethanethiol                          | 0.0008 | 0.00034 | 0.00065 | 0.0004 |
| Whiskey lactone Trans                      | 0.087  | 0.001   | 0.092   | 790    |
| $\delta$ -Decalactone                      | 1.56   | 1.75    | 2.1     | 386    |
| $\gamma$ -Butirrolattone                   | 853    | 2040    | 2100    | 100000 |
| $\gamma$ -Decalactone                      | 2.02   | 3.52    | 3.17    | 88     |
| $\gamma$ -Dodecalactone                    | 0.633  | 0.666   | 0.573   | 5      |
| $\gamma$ -Hexalactone                      | 0.372  | 0.264   | 0.229   | 13000  |
| $\gamma$ -Nonalattone                      | 34     | 45      | 41.7    | 30     |
| $\gamma$ -Octalactone                      | 1.02   | 0.65    | 0.857   | 373    |
| $\gamma$ -Undecalactone                    | 3.49   | 2.57    | 3.63    | 60     |
| $\alpha$ -(E)-Ionone                       | 0.061  | 0.032   | 0.041   | 2.6    |
| $\beta$ -Damascenone                       | 7.92   | 3.89    | 4.09    | 0.05   |
| TDN (1,1,5-Trimethyl-1,2-dihydronaftalene) | 0.813  | 2.03    | 2.49    | 2      |
| Trans- $\beta$ -Ionone                     | 0.488  | 0.107   | 0.162   | 0.09   |
| Diethyl sulfide                            | 0.024  | 0.242   | 0.088   | 0.93   |
| DEDS (Diethyl disulfide)                   | 0.125  | 0.161   | 0.119   | 4.3    |
| DMS (Dimethyl sulfide)                     | 23.9   | 4.9     | 7.54    | 25     |
| Dimethyl disulfide                         | 0.307  | 0.109   | 0.191   | 15     |
| H <sub>2</sub> S (Hydrogen Sulfide)        | 60.9   | 61.4    | 32.5    | 80     |
| Eugenol                                    | 14.3   | 0.468   | 2.05    | 6      |
| Isoeugenol                                 | 6.76   | 0.04    | 0.427   | 6      |
| ( $\pm$ )-Cis-Nerolidol                    | 0.378  | 0.744   | 0.796   | 15     |
| ( $\pm$ )-Trans-Nerolidol                  | 0.745  | 0.029   | 0.107   | 250    |
| Citronellol                                | 9.59   | 5.42    | 5.41    | 100    |
| Eucalyptol                                 | 0.064  | 0.15    | 0.03    | 1.5    |
| Geraniol                                   | 81.9   | 48.7    | 43.4    | 30     |
| Limonene                                   | 0.0025 | 0.708   | 0.0054  | 10     |
| Hotrienol                                  | 604    | 138     | 257     | 100    |
| Linalool                                   | 127    | 123     | 127     | 25     |
| Cis-Linalool oxide                         | 10.2   | 0.257   | 1.37    | 190    |
| Trans-Linalool oxide                       | 4.34   | 0.309   | 0.721   | 190    |
| Nerol                                      | 92.9   | 54.3    | 48.4    | 300    |
| Cis-Rose oxide                             | 0.007  | 0.002   | 0.003   | 0.2    |
| Trans-Rose oxide                           | 0.036  | 0.008   | 0.011   | 0.2    |
| $\alpha$ -Terpineol                        | 2.64   | 2.03    | 2.47    | 250    |
| 2-MEA (2-Mercaptoethyl acetate)            | 1.94   | 20.3    | 10.7    | -      |
| 2-M3F (2-Methyl-3-furanthiol)              | 4.29   | 2.31    | 3.14    | 1      |
| 3-MMPrOH (3-Mercapto 2-methylpropan-1-ol)  | 0.308  | 1.3     | 0.653   | 3      |
| 3-MMB (3-Methyl-3-mercaptoputan-1-ol)      | n.d.   | n.d.    | 0.007   | 1.5    |
| Benzothiazole                              | 4.3    | 0.436   | 0.918   | 70     |
| ETA (S-Ethyl Thioacetate)                  | 0.346  | 6.51    | 4.7     | 10     |
| Ethanethiol                                | n.d.   | 0.267   | 0.035   | 1.1    |
| E-2MP (Ethyl 2-mercaptopropionate)         | 0.0089 | 0.0081  | 0.0092  | 0.5    |

|                                         |         |        |         |        |
|-----------------------------------------|---------|--------|---------|--------|
| E-3MP (Ethyl 3-mercaptopropionate)      | n.d.    | 0.031  | 0.015   | 0.2    |
| MeSH (Metanethiol)                      | 23.1    | 8.29   | 8.35    | 0.3    |
| MTA (Methyl Thioacetate)                | 1.05    | 2.88   | 4.59    | -      |
| MTE (2-(Methylthio)ethanol)             | 48.5    | 125    | 91      | 250    |
| 3-MHA (3-Mercaptohexyl acetate)         | 0.00026 | 0.0014 | 0.00093 | 0.0042 |
| 4-MMP (4-Mercapto-4-methylpentan-2-one  | 0.00066 | 0.0003 | 0.00037 | 0.0008 |
| 3-MH (3-Mercaptohexan-1-ol)             | 0.064   | 0.047  | 0.051   | 0.06   |
| 3-MHt (3-Mercaptoheptan-1-ol)           | 0.208   | 7.15   | 1.97    | 0.035  |
| 4-MMPOH (4-Mercapto-4-methylpentan-2-ol | 0.0035  | 0.002  | 0.002   | 0.055  |

---
